# Supplementary material for: Lipid levels after childbirth and association with number of children: A population-based cohort study
Source: PubMed Central journal article supplement (PMC6812782; doi:10.1371/journal.pone.0223602), 2019-10-24
Supplement: pone.0223602.s001.pdf [file pone.0223602.s001.pdf]

**Supplemental Table S1.** Crude and adjusted odds ratio (OR) with 95% confidence interval (CI) for one lifetime pregnancy by lipid quintiles in 32 618 parous Norwegian women ( $\leq 69$  years of age), Cohort of Norway, 1994-2003. Estimates were obtained by logistic regression and adjusted for age at examination, year of the first birth, body mass index (linear term), oral contraceptive use, smoking, educational level and time since last meal.

| Lipid quintiles (mmol/l) | 1 child mothers (%) | $\geq 2$ children mothers | total mothers | Crude OR (95%CI) for one lifetime pregnancy | Adjusted OR (95%CI) for one lifetime pregnancy | $P^a$  |
|--------------------------|---------------------|---------------------------|---------------|---------------------------------------------|------------------------------------------------|--------|
| <b>LDL cholesterol</b>   |                     |                           |               |                                             |                                                |        |
| $\leq 2.87$              | 880 (12.4)          | 6224                      | 7104          | 1.0 reference                               | 1.0 reference                                  |        |
| 2.88-3.38                | 925 (13.5)          | 5892                      | 6817          | 1.11 (1.01-1.23)                            | 1.06 (0.95-1.18)                               |        |
| 3.39-3.89                | 915 (13.4)          | 5921                      | 6836          | 1.09 (0.99-1.21)                            | 1.07 (0.96-1.19)                               | <0.001 |
| 3.90-4.56                | 876 (13.7)          | 5493                      | 6369          | 1.13 (1.02-1.25)                            | 1.10 (0.98-1.24)                               |        |
| $\geq 4.57$              | 894 (16.3)          | 4598                      | 5492          | 1.37 (1.24-1.52)                            | 1.30 (1.14-1.45)                               |        |
| <b>Total cholesterol</b> |                     |                           |               |                                             |                                                |        |
| $\leq 4.60$              | 840 (11.8)          | 6258                      | 7098          | 1.0 reference                               | 1.0 reference                                  |        |
| 4.61-5.14                | 906 (13.0)          | 6051                      | 6957          | 1.11 (1.01-1.23)                            | 1.14 (1.02-1.27)                               |        |
| 5.15-5.69                | 984 (14.2)          | 5958                      | 6942          | 1.23 (1.11-1.36)                            | 1.25 (1.12-1.39)                               |        |
| 5.70-6.39                | 896 (14.3)          | 5369                      | 6265          | 1.24 (1.12-1.37)                            | 1.28 (1.15-1.44)                               | <0.001 |
| $\geq 6.40$              | 864 (16.1)          | 4492                      | 5356          | 1.43 (1.29-1.59)                            | 1.43 (1.27-1.61)                               |        |
| <b>TG (Triglyceride)</b> |                     |                           |               |                                             |                                                |        |
| $\leq 0.74$              | 955 (13.9)          | 5921                      | 6876          | 1.0 reference                               | 1.0 reference                                  |        |
| 0.75-0.98                | 907 (13.3)          | 5929                      | 6836          | 0.95 (0.86-1.05)                            | 0.93 (0.83-1.03)                               |        |
| 0.99-1.27                | 889 (13.6)          | 5637                      | 6526          | 0.98 (0.88-1.08)                            | 0.93 (0.83-1.03)                               | 0.08   |
| 1.28-1.76                | 855 (13.3)          | 5568                      | 6423          | 0.95 (0.86-1.05)                            | 0.88 (0.79-0.99)                               |        |
| $\geq 1.77$              | 884 (14.8)          | 5073                      | 5957          | 1.08 (0.98-1.19)                            | 1.01 (0.90-1.14)                               |        |
| <b>HDL cholesterol</b>   |                     |                           |               |                                             |                                                |        |
| $\leq 1.19$              | 896 (13.5)          | 5724                      | 6620          | 0.91 (0.83-1.01)                            | 0.87 (0.78-0.96)                               |        |
| 1.20-1.38                | 860 (13.1)          | 5681                      | 6541          | 0.81 (0.73-0.89)                            | 0.77 (0.69-0.86)                               |        |
| 1.39-1.55                | 827 (12.7)          | 5666                      | 6493          | 0.84 (0.76-0.93)                            | 0.74 (0.66-0.83)                               | <0.001 |
| 1.56-1.79                | 890 (14.1)          | 5407                      | 6297          | 0.87 (0.79-0.96)                            | 0.73 (0.65-0.82)                               |        |
| $\geq 1.80$              | 1017 (15.2)         | 5650                      | 6667          | 1.0 reference                               | 1.0 reference                                  |        |
| <b>TG/HDL-c ratio</b>    |                     |                           |               |                                             |                                                |        |
| $\leq 0.45$              | 1002 (14.3)         | 5978                      | 6980          | 1.0 reference                               | 1.0 reference                                  |        |
| 0.46-0.64                | 898 (12.8)          | 5583                      | 6481          | 0.96 (0.87-1.06)                            | 0.89 (0.79-0.98)                               |        |
| 0.65-0.90                | 851 (12.9)          | 5723                      | 6574          | 0.89 (0.80-0.98)                            | 0.84 (0.75-0.94)                               |        |
| 0.91-1.37                | 890 (13.6)          | 5628                      | 6518          | 0.94 (0.86-1.04)                            | 0.83 (0.74-0.93)                               | 0.01   |
| $\geq 1.38$              | 849 (13.9)          | 5216                      | 6065          | 0.97 (0.88-1.10)                            | 0.85 (0.76-0.96)                               |        |

<sup>a</sup>p for differences between categories (quintiles)
