# Supplementary material for: Lipid levels after childbirth and association with number of children: A population-based cohort study
Source: PubMed Central journal article supplement (PMC6812782; doi:10.1371/journal.pone.0223602), 2019-10-24
Supplement: pone.0223602.s003.pdf [file pone.0223602.s003.pdf]

**Supplemental Table S3.** Adjusted odds ratios (ORs) with 95% confidence interval (CI) for one lifetime pregnancy by lipid quintiles in 19 744 parous Norwegian women without reported cardiovascular disease in parents or siblings, Cohort of Norway, 1994-2003. Estimates were obtained by logistic regression and adjusted for age at examination, year of the first birth, body mass index (linear term), oral contraceptive use, smoking, educational level and time since last meal.

| Lipid quintiles (mmol/l) | 1 child mothers (%) | ≥ 2 children mothers | total mothers | OR (95%CI)       |
|--------------------------|---------------------|----------------------|---------------|------------------|
| <b>LDL cholesterol</b>   |                     |                      |               |                  |
| ≤ 2.87                   | 569 (11.6)          | 4327                 | 4896          | 1.0 reference    |
| 2.88-3.38                | 592 (13.4)          | 3808                 | 4400          | 1.11 (0.97-1.27) |
| 3.39-3.89                | 540 (13.1)          | 3580                 | 4120          | 1.06 (0.92-1.22) |
| 3.90-4.56                | 465 (13.1)          | 3079                 | 3544          | 1.08 (0.93-1.25) |
| ≥ 4.57                   | 448 (16.1)          | 2336                 | 2784          | 1.30 (1.12-1.53) |
| <b>Total cholesterol</b> |                     |                      |               |                  |
| ≤ 4.60                   | 554 (11.3)          | 4349                 | 4903          | 1.0 reference    |
| 4.61-5.14                | 568 (12.8)          | 3867                 | 4435          | 1.17 (1.02-1.34) |
| 5.15-5.69                | 580 (13.9)          | 3582                 | 4162          | 1.24 (1.08-1.42) |
| 5.70-6.39                | 477 (13.5)          | 3050                 | 3527          | 1.22 (1.05-1.42) |
| ≥ 6.40                   | 435 (16.0)          | 2282                 | 2717          | 1.43 (1.22-1.67) |
| <b>TG (Triglyceride)</b> |                     |                      |               |                  |
| ≤ 0.74                   | 582 (13.0)          | 3903                 | 4485          | 1.0 reference    |
| 0.75-0.98                | 542 (12.6)          | 3741                 | 4283          | 0.95 (0.83-1.09) |
| 0.99-1.27                | 515 (13.1)          | 3406                 | 3921          | 0.92 (0.82-1.07) |
| 1.28-1.76                | 476 (12.8)          | 3229                 | 3705          | 0.93 (0.80-1.07) |
| ≥ 1.77                   | 499 (14.9)          | 2851                 | 3350          | 1.09 (0.93-1.27) |
| <b>HDL cholesterol</b>   |                     |                      |               |                  |
| ≤ 1.19                   | 495 (12.8)          | 3375                 | 3870          | 0.84 (0.73-0.96) |
| 1.20-1.38                | 520 (13.4)          | 3358                 | 3878          | 0.82 (0.71-0.95) |
| 1.39-1.55                | 503 (12.6)          | 3487                 | 3990          | 0.82 (0.71-0.95) |
| 1.56-1.79                | 497 (12.8)          | 3377                 | 3874          | 0.72 (0.62-0.84) |
| ≥ 1.80                   | 599 (14.5)          | 3533                 | 4132          | 1.0 reference    |
| <b>TG/HDL-c ratio</b>    |                     |                      |               |                  |
| ≤ 0.45                   | 607 (13.5)          | 3870                 | 4477          | 1.0 reference    |
| 0.46-0.64                | 542 (13.2)          | 3547                 | 4089          | 0.91 (0.78-1.03) |
| 0.65-0.90                | 473 (11.9)          | 3490                 | 3963          | 0.82 (0.71-0.95) |
| 0.91-1.37                | 522 (13.6)          | 3301                 | 3823          | 0.88 (0.77-1.02) |
| ≥ 1.38                   | 470 (13.8)          | 2922                 | 3392          | 0.89 (0.76-1.04) |
